# Supplementary material
Source: PubMed Central journal article supplement (PMC5912881)
Supplement: NIHMS941552-supplement-1.pdf [file NIHMS941552-supplement-1.pdf]

# Supplementary Figure 1

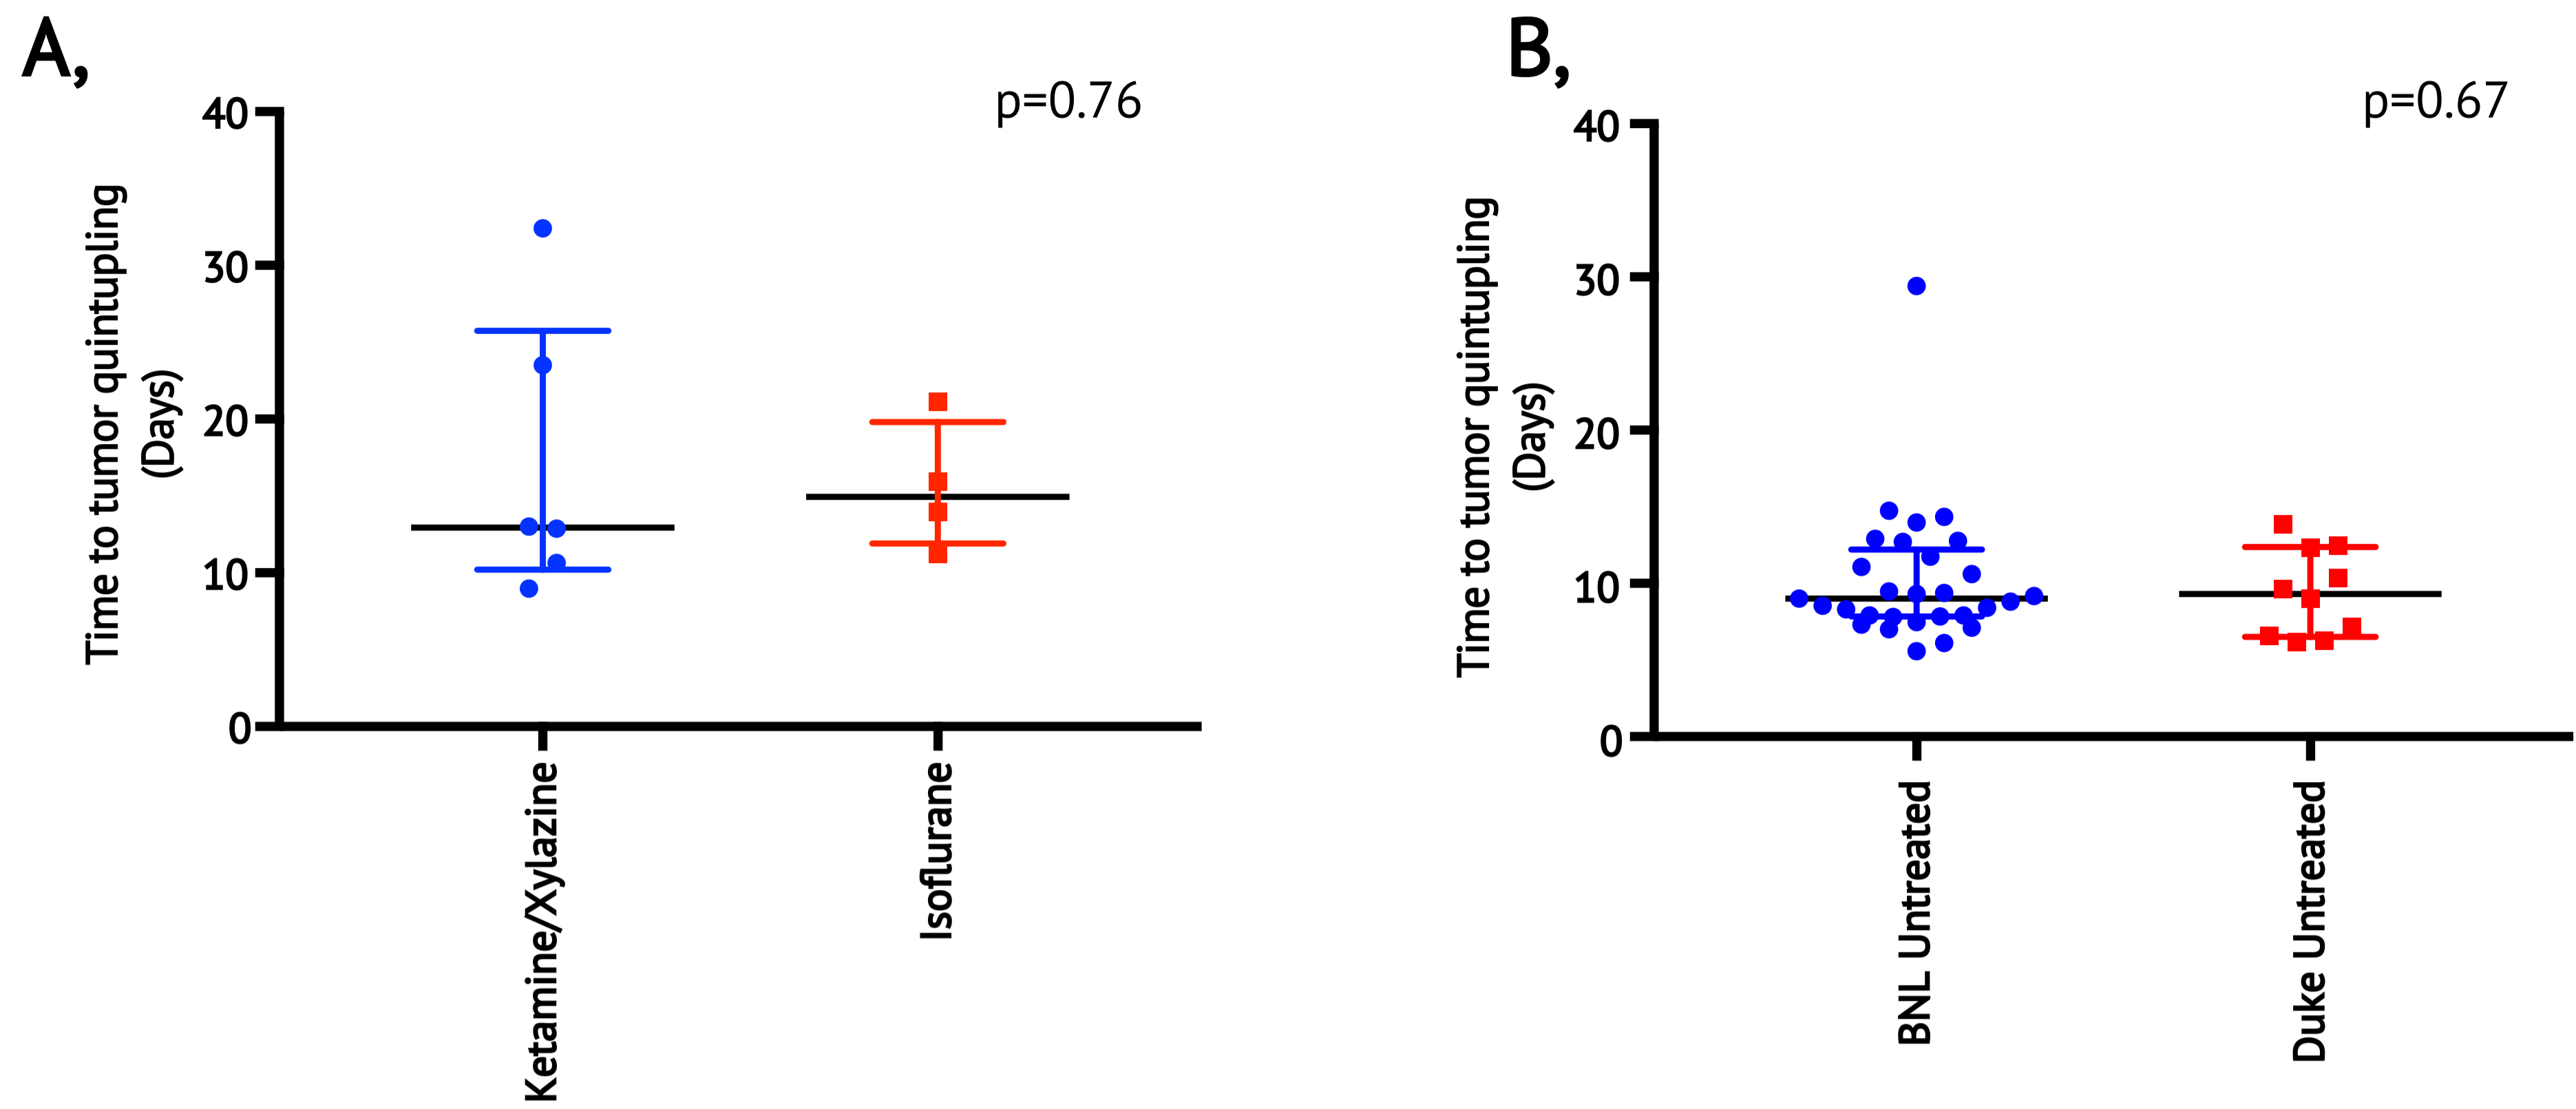

Comparing the effect anesthetic agent and housing location on tumor quintupling.

**A)** Tumor quintupling times in mice treated with 20 Gy X-rays who were anesthetized with ketamine/xylazine vs. isoflurane, demonstrating no significant differences. **B)** Tumor quintupling time in untreated controls followed at Brookhaven National Laboratory vs. Duke University Medical Center, demonstrating no significant differences.
