# Supplementary material
Source: PubMed Central journal article supplement (PMC5912881)
Supplement: NIHMS941552-supplement-2.pdf [file NIHMS941552-supplement-2.pdf]

# Supplementary Figure 2

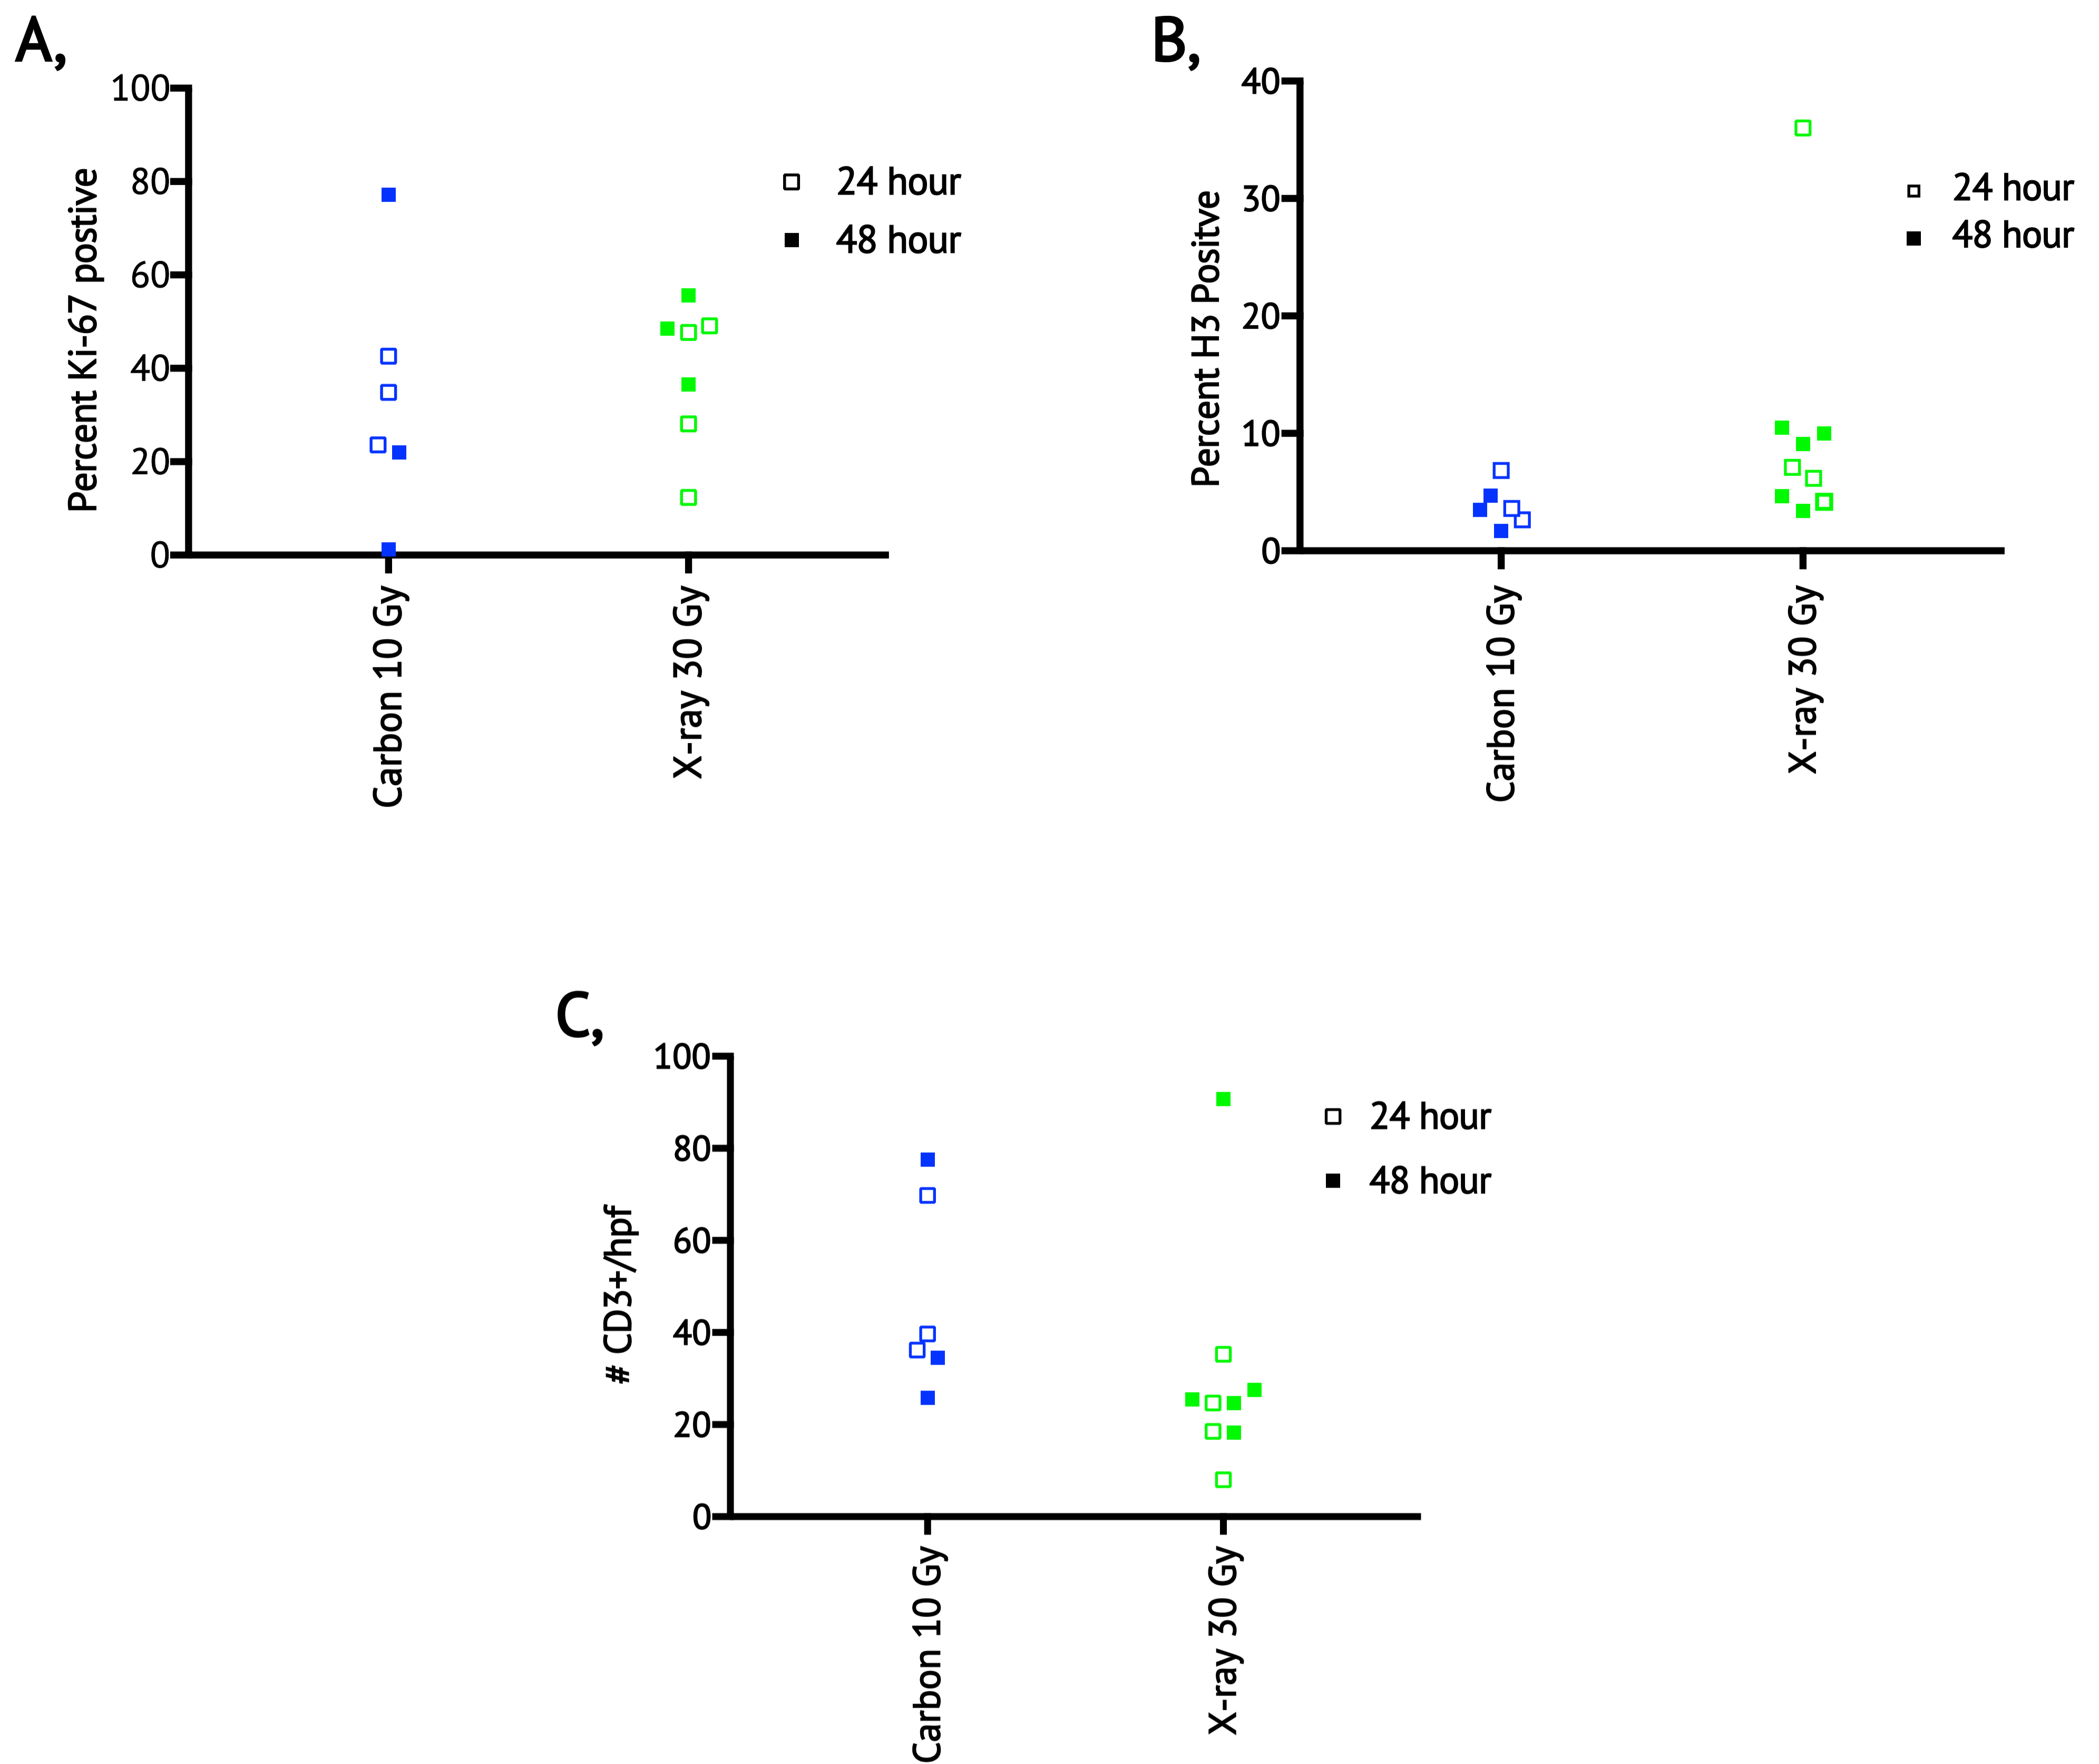

Histological analyses at 24 and 48 hours. Data are from Figure 5 divided into discrete time point of tumor harvest.  
A) Percent Ki-67 positive. B) Percent phospho-histone H3 positive. C) Number of CD3 positive cells per high power field.
