# Supplementary material
Source: PubMed Central journal article supplement (PMC5912881)
Supplement: NIHMS941552-supplement-3.pdf [file NIHMS941552-supplement-3.pdf]

# Supplementary Figure 3

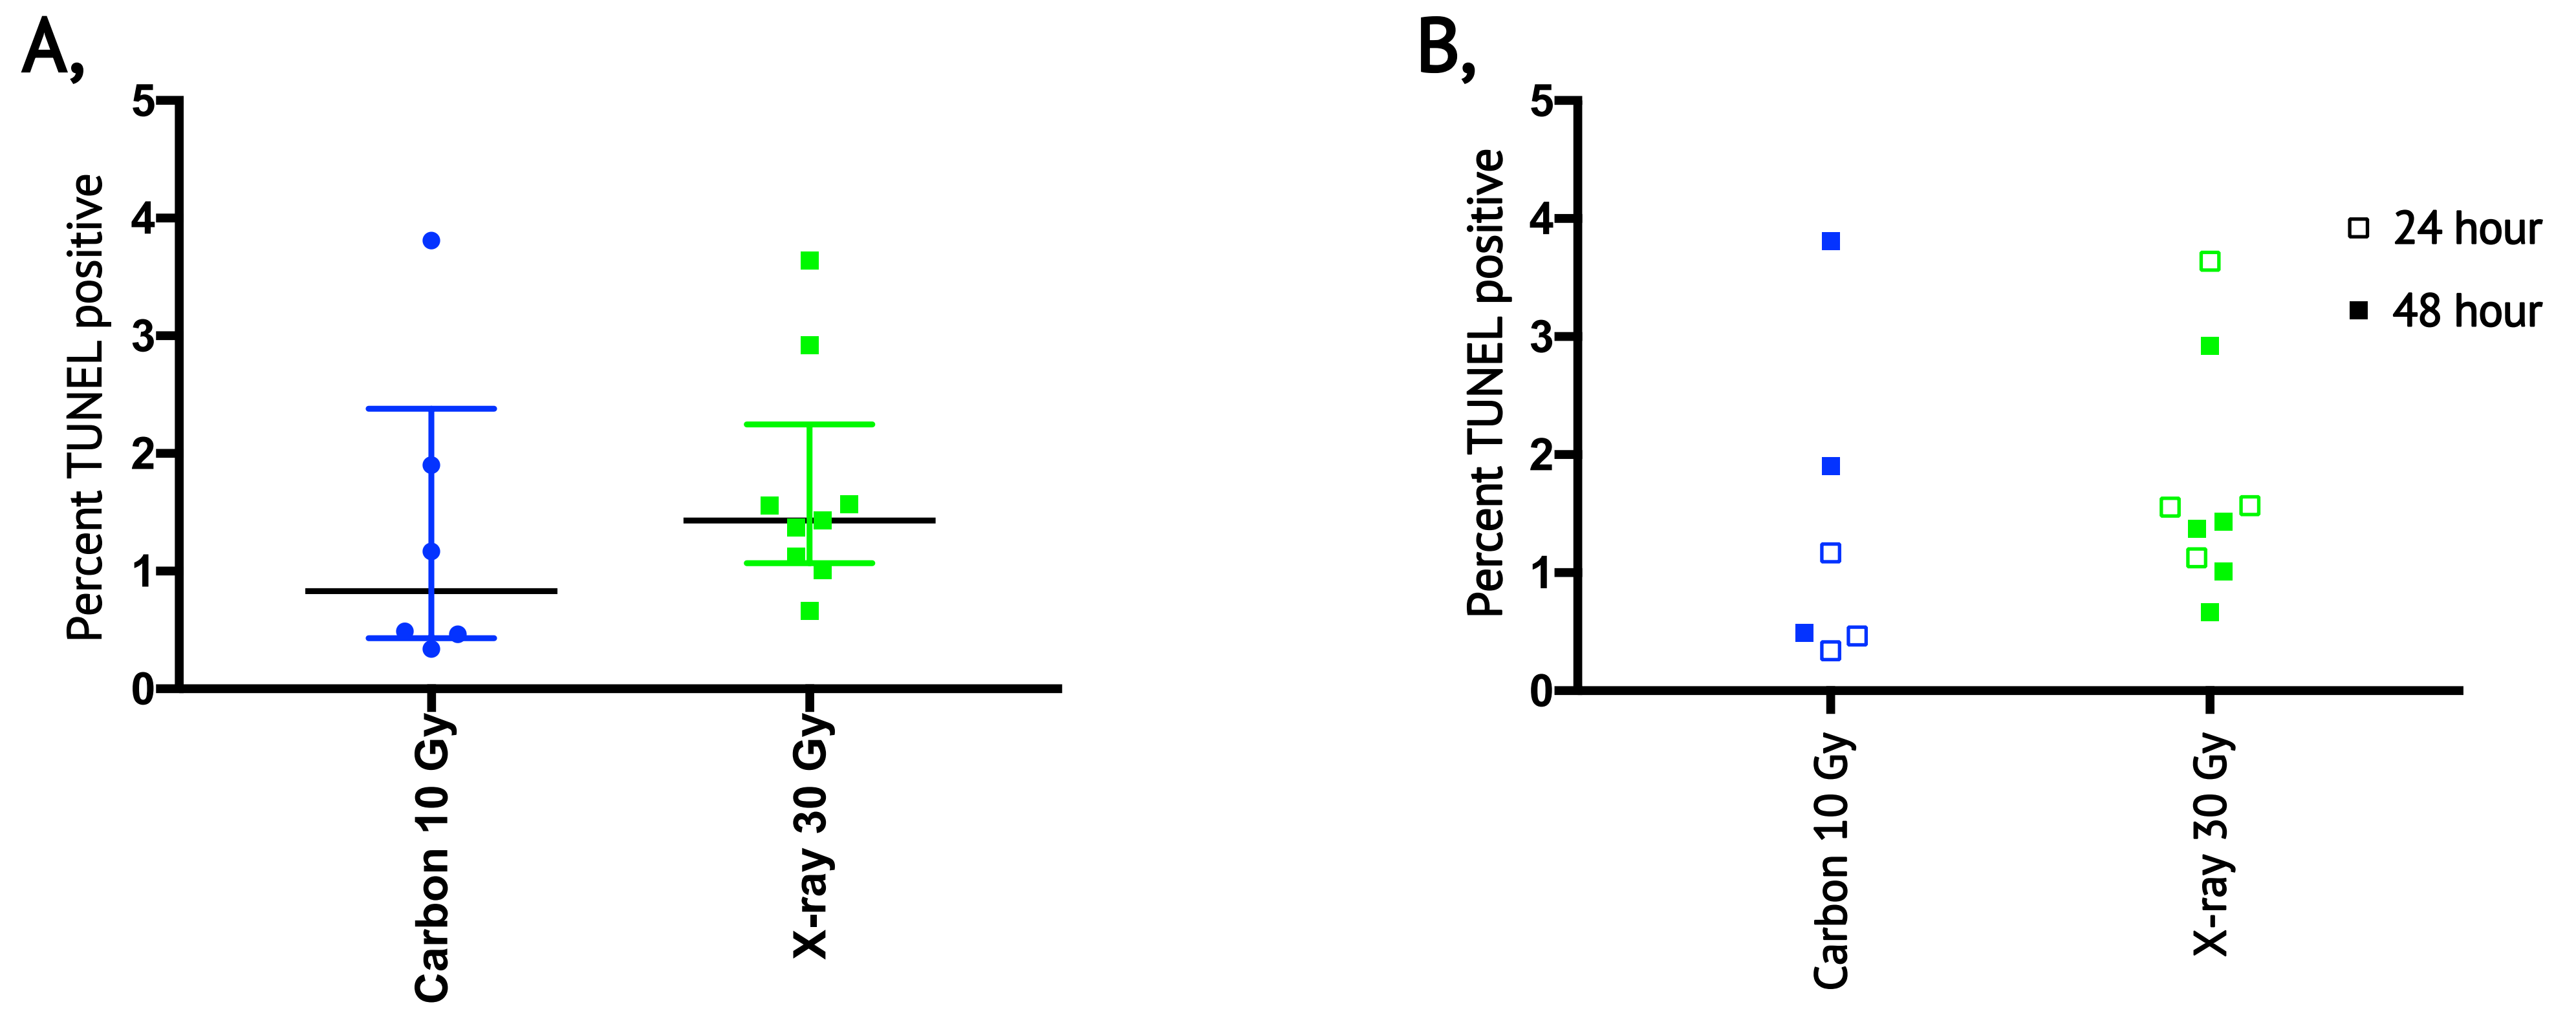

Quantification of TUNEL staining for sarcomas at 24 or 48 hours after 10 Gy carbon ions or 30 Gy X-rays.

A) TUNEL staining was similar, indicating that there were no significant differences in cell death. B) TUNEL staining at 24 and 48 hours.
